# Supplementary material for: New Last Glacial Maximum ice thickness constraints for the Weddell Sea Embayment, Antarctica
Source: Copernicus journal article supplement (doi:10.5194/tc-13-2935-2019), 2019-11-08
Supplement: Supplementary file 1 [file Table S1 edits.xlsx]

## Sheet: Table 1
Table 1
Sample information
Study Site	Sub-site	Sample ID	Type	Latitude	Longitude	Elevation	Shielding factor	Thickness
						(m asl)		(cm)
Schmidt Hills	Mt Coulter south peak	10-MPS-035-CSP	E	-83.2964	-58.1291	256	0.9942	5
	Mt Coulter south peak	10-MPS-031-CSP	E	-83.2964	-58.1291	256.1	0.9942	7
	Mt Coulter south peak	10-MPS-022-CSP	E	-83.2911	-58.1003	352.4	0.9937	6
	Mt Coulter south peak	10-MPS-024-CSP	E	-83.2911	-58.1003	353.6	0.9937	5
	No Name Spur	10-MPS-043-NNS	E	-83.2823	-58.163	417	0.9942	4.5
	No Name Spur	10-MPS-046-NNS	E	-83.2782	-58.1623	499.3	0.9958	10
	No Name Spur	10-MPS-038-NNS	E	-83.2778	-58.1438	550.6	0.9986	5
	No Name Spur	10-MPS-039-NNS	E	-83.2778	-58.1438	550.6	0.9986	5
	No Name Spur	10-MPS-008-NNS	E	-83.2712	-58.1143	713.2	0.9997	6
	No Name Spur	10-MPS-013-NNS	E	-83.2709	-58.112	719.2	0.9997	4.5
	No Name Spur	10-MPS-012-NNS	E	-83.2703	-58.1095	725.6	0.9999	5
	Mt Coulter main massif	10-MPS-006-COU	E	-83.2852	-57.9768	922.8	0.9945	4.5
	Mt Coulter south peak	10-MPS-015-CSP	E	-83.2952	-57.9755	945.1	0.9998	4
	Mt Coulter south peak	10-MPS-016-CSP	E	-83.2948	-57.9767	948.3	0.9999	9
	Mt Nervo	10-MPS-051-NVO	B	-83.2392	-57.9353	1034	1	3.25727
Thomas Hills	Mt Warnke summit	11-ATH-201-WAR	E	-84.3406	-64.87	866	0.9999	6
		11-ATH-202-WAR	E	-84.3405	-64.8675	863	0.9991	7
Lassiter Coast	Coastal Bowman Pen.	P11.14.1	B	-74.5745	-62.4881	510	0.9771	3.47875
	Coastal Bowman Pen.	P11.11.4	B	-74.5735	-62.4808	628	0.9974	3.204
	Mt Lampert	P11.13.3	B	-74.5489	-62.5897	710	0.9774	4.66
	Mt Lampert	P11.13.5	B	-74.5465	-62.5919	768	0.9975	2.952
	Mt Lampert	P11.13.6	B	-74.5457	-62.5934	795	0.9996	5.34
	Bowman Pen.	P11.12.1	B	-74.557	-62.4676	800	0.9998	3.53
	Bowman Pen.	P11.12.2	B	-74.555	-62.4692	830	0.9999	5.5
	Coastal Bowman Pen.	P11.12.6	B	-74.5532	-62.472	875	1	3.05
Shackleton Range	Mt Skidmore	CF_60_08	E	-80.2619	-28.8432	268	0.9919	5
		CF_147_08	E	-80.2722	-28.78	284	0.9997	5
		CF_143_08	E	-80.2738	-28.7768	308	0.9997	4.5
		CF_108_08	E	-80.2739	-28.7344	339	0.9992	5
		CF_104_08	E	-80.2781	-28.7182	380	0.9992	5
		CF_44_08	E	-80.285	-28.6885	474	0.9919	3.5
		CF_36_08	E	-80.2902	-28.6703	576	0.9919	3
		CF_120_08	E	-80.3244	-28.8552	808	0.9992	4
		CF_119_08	B	-80.3255	-28.839	825	0.9992	5
	Mt Provender	CF_184_08	E	-80.3846	-30.0679	239	0.9968	4.5
		CF_160_08	B	-80.3814	-29.9561	893	0.9982	4.5
