# Supplementary material for: New Last Glacial Maximum ice thickness constraints for the Weddell Sea Embayment, Antarctica
Source: Copernicus journal article supplement (doi:10.5194/tc-13-2935-2019), 2019-11-08
Supplement: Supplementary file 2 [file Table S2 edits.xlsx]

## Sheet: Table 2
Table 2
In situ 14C analytical data and exposure ages
Study Site	Sub-site	Sample ID	TUCNL	AMS Lab	AMS ID	Quartz weight	C yield	±1σ	Diluted Gas Mass	±1σ	14C/13C corrected	±1σ	δ13C	±1σ	14C/C total	±1σ	total 14C atoms	±1σ	14C conc.	±1σ	±6%	14C age	±1σint	±1σ ext	$Effective blank	±1σ	Effective Blank as %
						(g)	(μg)	(μg)	(μg)	(μg)			(‰)	(‰)			blank corrected	(at)	(at.g-1)	(at.g-1)	(at.g-1)	(ka)	(ka)	(ka)	(at)	(at)	of total 14C At Sample
Schmidt Hills	Mt Coulter south peak	10-MPS-035-CSP	163	NOSAMS	N/Aϑ	6.0306	32.9	0.4	104.4	1.3	4.136e-12	4.574e-14	-6.33	0.96	4.53e-14	5.024e-16	141800	7177	23511.6	1107.32	1410.69	1.082	0.069	0.09	95330	5947	40.2016
	Mt Coulter south peak	10-MPS-031-CSP	126	LLNL	176522	2.4138	52.1	0.7	383.2	4.9	1.466e-12	2.631e-14	-6.92	0.5	1.605e-14	2.881e-16	213100	9034	88264.3	2957.66	5295.86	5.476	0.466	0.607	95330	5947	30.9081
	Mt Coulter south peak	10-MPS-022-CSP	96	LLNL	176186	6.0893	68.4	0.9	380.6	4.9	4.157e-12	3.068e-14	-1.14	0.5	4.577e-14	3.384e-16	778200	14220	127793	2080.54	7667.57	8.37	0.869	1.132	95330	5947	10.9132
	Mt Coulter south peak	10-MPS-024-CSP	97	LLNL	176187	6.0822	56.7	0.7	381.6	4.9	3.367e-12	2.741e-14	-0.93	0.5	3.708e-14	3.023e-16	614200	12300	100975	1785.42	6058.53	5.758	0.499	0.65	95330	5947	13.4357
	No Name Spur	10-MPS-043-NNS	291	NOSAMS	OS-140541	5.0901	55.4	0.7	102.2	1.3	1.519e-11	1.088e-13	-13.57	0.5	1.652e-13	1.185e-15	781700	14180	153570	2518.67	9214.22	10.42	1.253	1.631	64680	6847	7.64196
	No Name Spur	10-MPS-046-NNS	103	LLNL	176509	5.058	40.2	0.5	382.2	4.9	6.138e-12	3.295e-14	0.2	0.5	6.766e-14	3.643e-16	1201000	18970	237508	3487.18	14250.5	--	--	--	95330	5947	7.35384
	No Name Spur	10-MPS-038-NNS	125	LLNL	176521	5.0548	38.1	0.5	376.2	4.8	4.966e-12	5.025e-14	-3.94	0.5	5.453e-14	5.522e-16	933200	17810	184613	2859.04	11076.8	12.036	1.632	2.124	95330	5947	9.26857
	No Name Spur	10-MPS-039-NNS	137	LLNL	176866	4.991	44.8	0.6	383.2	4.9	6.436e-12	2.413e-14	-6.362	0.5	7.049e-14	2.658e-16	1259000	19030	252257	3673.71	15135.4	--	--	--	95330	5947	7.0389
	No Name Spur	10-MPS-008-NNS	105	LLNL	176511	5.1054	49.6	0.6	387.9	5	6.053e-12	5.609e-14	0.3	0.5	6.674e-14	6.19e-16	1203000	21370	235569	3458.01	14134.1	15.744	2.834	3.69	95330	5947	7.34251
	No Name Spur	10-MPS-013-NNS	136	LLNL	176865	5.3557	70.1	0.9	382.9	4.9	7.472e-12	2.818e-14	-6.63	0.5	8.182e-14	3.103e-16	1475000	21810	275499	3916.78	16529.9	33.39	27.667	36.014	95330	5947	6.0707
	No Name Spur	10-MPS-012-NNS	139	LLNL	176867	4.4988	38.8	0.5	346	4.4	5.843e-12	2.634e-14	-6.09	0.5	6.401e-14	2.898e-16	1015000	16210	225644	3426.33	13538.6	13.355	2	2.603	95330	5947	8.58574
	Mt Coulter main massif	10-MPS-006-COU	107	LLNL	176513	5.0108	52.9	0.7	378.5	4.8	8.224e-12	4.826e-14	-0.97	0.5	9.056e-14	5.327e-16	1623000	24940	323947	4549.73	19436.8	33.19	27	35.142	95330	5947	5.54783
	Mt Coulter south peak	10-MPS-015-CSP	101	LLNL	176507	5.0228	31.4	0.4	383.2	4.9	6.68e-12	3.776e-14	1.45	0.5	7.373e-14	4.179e-16	1321000	20710	263068	3801.11	15784.1	12.344	1.711	2.228	95330	5947	6.73078
	Mt Coulter south peak	10-MPS-016-CSP	102	LLNL	176508	4.9935	46.8	0.6	380.1	4.9	7.172e-12	4.601e-14	0.7	0.5	7.911e-14	5.085e-16	1412000	22410	282836	4045.84	16970.2	16.325	3.078	4.007	95330	5947	6.32443
	Mt Nervo	10-MPS-051-NVO	393	NOSAMS	OS-144278	2.0017	28.6	0.4	97.6	1.2	1.113e-11	5.988e-14	-12.63	0.5	1.211e-13	6.535e-16	579200	9358	289400	4394	17364	12.8	1.8	2.4	13340	5141	2.25132
Repeat measurements	No Name Spur	10-MPS-046-NNS	300	NOSAMS	OS-141775	10.0147	89.9	1.2	105.5	1.4	3.75e-11	1.77e-13	-8.68	0.5	4.097e-13	1.941e-15	2102000	30370	209933	2854.26	12596	24.198	8.771	11.416	64680	6847	2.98521
	No Name Spur	10-MPS-039-NNS	301	NOSAMS	OS-141776	4.983	37.9	0.5	99.3	1.3	1.486e-11	1.255e-13	-10.14	0.5	1.621e-13	1.371e-15	742500	14150	149001	2488.17	8940.05	7.938	0.8	1.041	64680	6847	8.01308
	No Name Spur	10-MPS-013-NNS	298	NOSAMS	OS-141773	10.0444	114.1	1.5	114.1	1.5	3.452e-11	1.566e-13	-8.76	0.5	3.771e-13	1.718e-15	2093000	30110	208340	2833.73	12500.4	11.169	1.42	1.848	64680	6847	2.99766
	Mt Coulter main massif	10-MPS-006-COU	297	NOSAMS	OS-141790	10.0569	84.6	1.1	111.7	1.4	4.429e-11	1.779e-13	-8.9	0.5	4.838e-13	1.953e-15	2645000	37020	263003	3516.97	15780.2	13.15	1.938	2.523	64680	6847	2.387
	No Name Spur	10-MPS-046-NNS	334	NOSAMS	OS-143032	3.1138	31.5	0.4	113.1	1.4	1.283e-11	7.924e-14	-25.19	0.5	1.379e-13	8.534e-16	717100	13060	230305	3895.33	13818.3	--	--	--	64680	6847	8.27343
	No Name Spur	10-MPS-013-NNS	331	NOSAMS	OS-143028	3.0513	32.5	0.4	93.9	1.2	1.196e-11	8.735e-14	-19.65	0.5	1.292e-13	9.455e-16	543700	11290	178171	3399.09	10690.2	8.273	0.853	1.111	64680	6847	10.6315
	Mt Coulter main massif	10-MPS-006-COU	332	NOSAMS	OS-143029	3.1186	31.1	0.4	99.7	1.3	1.48e-11	8.579e-14	-17.12	0.5	1.604e-13	9.318e-16	737100	13190	236359	3957.35	14181.5	10.36	1.241	1.615	64680	6847	8.06705
Thomas Hills	Mt Warnke summit	11-ATH-201-WAR	305	NOSAMS	OS-141780	6.0179	57.7	0.7	89.9	1.2	2.859e-11	1.771e-13	-15.64	0.5	3.103e-13	1.926e-15	1334000	21050	221639	3186.08	13298.3	10.095	1.186	1.544	64680	6847	4.62436
		11-ATH-202-WAR	306	NOSAMS	OS-141781	5.2158	38.6	0.5	109.5	1.4	2.034e-11	1.29e-13	-8.72	0.5	2.223e-13	1.412e-15	1156000	18740	221559	3271.1	13293.5	10.294	1.227	1.597	64680	6847	5.29869
Lassiter Coast	Coastal Bowman Pen.	P11.14.1	384	NOSAMS	OS-146891	4.9963	3.9	0.1	110.4	1.4	5.902e-12	4.613e-14	-13.53	0.5	6.416e-14	5.022e-16	341800	6941	68420	1273	4105.2	2.917	0.21	0.273	13340	5141	3.75627
	Coastal Bowman Pen.	P11.11.4	218	NOSAMS	OS-136997	5.1061	11.3	0.1	110.8	1.4	1.405e-11	1.289e-13	-4.57	0.5	1.541e-13	1.416e-15	791600	15130	155033	2531.85	9301.96	7.473	0.729	0.949	64680	6847	7.5536
	Mt Lampert	P11.13.3	181	NOSAMS	OS-134207	4.9154	8.6	0.1	110.6	1.4	1.368e-11	7.488e-14	-5.63ǂ	0.5	1.499e-13	8.229e-16	736200	13020	150850	2493.44	9050.98	6.721	0.623	0.81	95330	5947	11.4644
	Mt Lampert	P11.13.5	214	NOSAMS	OS-136996	5.0786	13.3	0.2	107.2	1.4	1.612e-11	1.439e-13	-5	0.5	1.768e-13	1.58e-15	885700	16340	174397	2749.67	10463.8	7.434	0.723	0.941	64680	6847	6.8057
	Mt Lampert	P11.13.6	182	NOSAMS	OS-134208	4.9816	9	0.1	106.7	1.4	1.551e-11	8.378e-14	-5.63ǂ	0.5	1.7e-13	9.209e-16	814300	13980	164423	2636.51	9865.36	6.713	0.621	0.809	95330	5947	10.4801
	Bowman Pen.	P11.12.1	177	NOSAMS	OS-134202	4.9408	7.4	0.1	106.2	1.4	1.456e-11	7.393e-14	-5.63ǂ	0.5	1.595e-13	8.129e-16	754200	13130	155134	2537.47	9308.06	5.994	0.528	0.688	95330	5947	11.2215
	Bowman Pen.	P11.12.2	180	NOSAMS	OS-134205	4.9283	9.4	0.1	105.5	1.4	1.649e-11	8.143e-14	-5.63ǂ	0.5	1.808e-13	8.956e-16	860900	14410	176685	2785.39	10601.1	7.178	0.686	0.893	95330	5947	9.96936
	Coastal Bowman Pen.	P11.12.6	264	NOSAMS	OS-139206	3.0402	5.9	0.1	108.8	1.4	1.011e-11	6.46e-14	-5.88	0.5	1.107e-13	7.092e-16	539400	11030	178270	3406.19	10696.2	6.688	0.618	0.804	64680	6847	10.7072
Shackleton Range	Mt Skidmore	CF_60_08	272	NOSAMS	OS-139204	5.0057	24.4	0.3	112.9	1.4	4.259e-12	3.876e-14	-6.51	0.5	4.663e-14	4.249e-16	199300	8006	40124.8	1527.21	2407.49	1.948	0.132	0.172	64680	6847	24.5019
		CF_147_08	296	NOSAMS	OS-141771	4.4667	62.4	0.8	110.9	1.4	1.521e-11	1.043e-13	-11.21	0.5	1.657e-13	1.139e-15	856800	15040	191817	3054.39	11509	--	--	--	64680	6847	7.01914
		CF_143_08	271	NOSAMS	OS-139201	5.0853	23.7	0.3	109.8	1.4	1.423e-11	6.788e-14	-7.1	0.5	1.558e-13	7.455e-16	792900	13580	156250	2548.55	9374.99	13.325	1.991	2.591	64680	6847	7.54215
		CF_108_08	294	NOSAMS	OS-141770	5.0434	116.2	1.5	116.2	1.5	1.496e-11	1.332e-13	-10.42	0.5	1.631e-13	1.454e-15	885800	16340	175645	2769.2	10538.7	17.456	3.603	4.689	64680	6847	6.80498
		CF_104_08	270	NOSAMS	OS-139197	4.9929	38.5	0.5	110.2	1.4	1.515e-11	7.901e-14	-7.7	0.5	1.657e-13	8.667e-16	851000	14400	171023	2726.09	10261.4	14.251	2.285	2.974	64680	6847	7.0636
		CF_44_08	269	NOSAMS	OS-139203	4.9673	13.1	0.2	110.2	1.4	1.359e-11	7.13e-14	-6.58	0.5	1.488e-13	7.83e-16	757500	13280	152703	2530.64	9162.19	9.271	1.026	1.336	64680	6847	7.86689
		CF_36_08	267	NOSAMS	OS-139202	5.0315	18.9	0.2	110.5	1.4	1.679e-11	7.516e-14	-7.68	0.5	1.837e-13	8.254e-16	952900	15410	190512	2938.46	11430.7	12.086	1.644	2.14	64680	6847	6.35626
		CF_120_08	265	NOSAMS	OS-139199	2.954	96.2	1.2	96.2	1.2	1.202e-11	6.714e-14	-6.66	0.5	1.316e-13	7.37e-16	570300	11210	193622	3604.14	11617.3	8.414	0.877	1.141	64680	6847	10.1861
		CF_119_08	266	NOSAMS	OS-139198	4.944	11.3	0.1	111.8	1.4	1.717e-11	1.003e-13	-6.55	0.5	1.88e-13	1.101e-15	989100	16340	201252	3074.4	12075.1	8.917	0.963	1.253	64680	6847	6.1379
	Mt Provender	CF_184_08	302	NOSAMS	OS-141778	4.0281	87.1	1.1	114.7	1.5	7.153e-12	8.305e-14	-11.96	0.5	7.79e-14	9.051e-16	383300	10340	95170	2218	5710.2	6.078	0.539	0.701	64680	6847	14.4381
		CF_160_08	303	NOSAMS	OS-141779	3.9701	31	0.4	99.8	1.3	2.695e-11	1.65e-13	-8.1	0.5	2.946e-13	1.808e-15	1410000	22030	355000	5058	21300	--	--	--	64680	6847	4.38604
	ǂAverage of values measured by isotope ratio mass spectrometry. Actual measured values otherwise.
	$Representative of the blanks run during the running of the samples.
	ϑSample run at no cost during test run by NOMSAMS, no AMS ID
