# Supplementary material for: New Last Glacial Maximum ice thickness constraints for the Weddell Sea Embayment, Antarctica
Source: Copernicus journal article supplement (doi:10.5194/tc-13-2935-2019), 2019-11-08
Supplement: Supplementary file [file tc-13-2935-2019-supplement-title-page.pdf › tc-13-2935-2019-supplement-title-page.pdf]

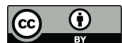

## *Supplement of*

# **New Last Glacial Maximum ice thickness constraints for the Weddell Sea Embayment, Antarctica**

**Keir A. Nichols et al.**

*Correspondence to:* Keir A. Nichols ([knichol3@tulane.edu](mailto:knichol3@tulane.edu))

- [tc-13-2935-2019-supplement-title-page.pdf](#)
- [Nichols\\_et\\_al\\_Cryosphere\\_Supplement\\_final.pdf](#)
- [Table S1 edits.xlsx](#)
- [Table S2 edits.xlsx](#)

The copyright of individual parts of the supplement might differ from the CC BY 4.0 License.
